# Supplementary material for: Surface Thermodynamic Properties of Poly Lactic Acid by Inverse Gas Chromatography
Source: MDPI journal article supplement (doi:10.3390/biomimetics9050268), 2024-04-28
Supplement: s1 [file s1]

## Supplementary Materials

# Surface thermodynamic properties of poly lactic acid by inverse gas chromatography

Tayssir Hamieh<sup>1,2</sup>

<sup>1</sup>Faculty of Science and Engineering, Maastricht University, P.O. Box 616, 6200 MD Maastricht, Netherlands, E-mail: [t.hamieh@maastrichtuniversity.nl](mailto:t.hamieh@maastrichtuniversity.nl)

<sup>2</sup>Laboratory of Materials, Catalysis, Environment and Analytical Methods Laboratory (MCEMA), Faculty of Sciences, Lebanese University, 1533, Hadath, Lebanon

**Table S1.** Values of  $-RT\ln V_n$  (in kJ/mol) of the various non-polar solvents adsorbed on PLA polymer as a function of the temperature.

| T(K)   | C5    | C6    | C7    | C8    | C9    |
|--------|-------|-------|-------|-------|-------|
| 313.15 | 4.521 | 3.618 | 2.498 | 1.780 | 1.407 |
| 318.15 | 4.618 | 3.702 | 2.630 | 1.902 | 1.545 |
| 323.15 | 4.714 | 3.785 | 2.763 | 2.025 | 1.683 |
| 328.15 | 4.723 | 3.912 | 2.888 | 2.156 | 1.804 |
| 333.15 | 4.732 | 4.040 | 3.014 | 2.288 | 1.926 |
| 338.15 | 4.780 | 4.127 | 3.074 | 2.329 | 2.022 |
| 343.15 | 4.828 | 4.213 | 3.135 | 2.369 | 2.118 |
| 348.15 | 5.010 | 4.410 | 3.287 | 2.411 | 2.116 |
| 353.15 | 5.193 | 4.606 | 3.439 | 2.454 | 2.113 |
| 358.15 | 5.454 | 4.792 | 3.630 | 2.530 | 2.179 |
| 363.15 | 5.714 | 4.979 | 3.822 | 2.607 | 2.244 |
| 368.15 | 5.684 | 4.901 | 4.034 | 2.718 | 2.356 |
| 373.15 | 5.654 | 4.823 | 4.247 | 2.829 | 2.468 |

**Table S2.** Values of  $-RT\ln V_n$  (in kJ/mol) of the various polar solvents adsorbed on PLA polymer as a function of the temperature.

| T(K)   | CH <sub>2</sub> Cl <sub>2</sub> | Ethyl Acetate | Acetone | Toluene | THF    |
|--------|---------------------------------|---------------|---------|---------|--------|
| 313.15 | -4.141                          | 1.494         | 1.092   | -5.685  | -3.356 |
| 318.15 | -3.402                          | 2.161         | 1.380   | -5.234  | -2.820 |
| 323.15 | -2.669                          | 2.801         | 1.682   | -4.792  | -2.290 |
| 328.15 | -1.964                          | 3.374         | 1.999   | -4.421  | -1.806 |
| 333.15 | -1.260                          | 3.879         | 2.094   | -4.049  | -1.321 |

|        |        |       |        |        |        |
|--------|--------|-------|--------|--------|--------|
| 338.15 | -2.236 | 1.932 | -0.839 | -4.924 | -3.461 |
| 343.15 | -3.219 | 0.167 | -4.560 | -5.807 | -5.622 |
| 348.15 | -1.653 | 1.301 | -0.783 | -4.758 | -2.731 |
| 353.15 | -0.093 | 3.046 | 3.420  | -3.717 | 0.568  |
| 358.15 | 0.352  | 3.792 | 4.415  | -3.337 | 1.203  |
| 363.15 | 0.789  | 4.459 | 5.182  | -2.966 | 1.831  |
| 368.15 | 0.846  | 4.649 | 5.403  | -2.786 | 2.058  |
| 373.15 | 0.926  | 4.915 | 5.573  | -2.656 | 2.349  |

**Table S3.** Values of  $-\Delta G_a^d(T)$  (kJ/mol) of the various non-polar solvents adsorbed on PLA polymer as a function of the temperature.

| T(K)   | C5    | C6    | C7    | C8    | C9    |
|--------|-------|-------|-------|-------|-------|
| 313.15 | 4.675 | 5.520 | 6.239 | 7.231 | 7.851 |
| 318.15 | 4.604 | 5.436 | 6.144 | 7.121 | 7.732 |
| 323.15 | 4.541 | 5.362 | 6.060 | 7.024 | 7.626 |
| 328.15 | 4.407 | 5.204 | 5.881 | 6.816 | 7.401 |
| 333.15 | 4.273 | 5.045 | 5.702 | 6.609 | 7.176 |
| 338.15 | 4.241 | 5.008 | 5.660 | 6.560 | 7.123 |
| 343.15 | 4.217 | 4.980 | 5.628 | 6.524 | 7.083 |
| 348.15 | 4.517 | 5.334 | 6.028 | 6.987 | 7.586 |
| 353.15 | 4.824 | 5.697 | 6.439 | 7.463 | 8.103 |
| 358.15 | 5.116 | 6.041 | 6.828 | 7.914 | 8.592 |
| 363.15 | 5.416 | 6.395 | 7.228 | 8.377 | 9.096 |
| 368.15 | 5.148 | 6.079 | 6.870 | 7.962 | 8.645 |
| 373.15 | 4.880 | 5.762 | 6.512 | 7.548 | 8.195 |

**Table S4.** Values of  $-\Delta G_a^d(T)$  (kJ/mol) of the various polar solvents adsorbed on PLA polymer as a function of the temperature.

| T(K)   | CH <sub>2</sub> Cl <sub>2</sub> | Ethyl Acetate | Acetone | Toluene | THF   |
|--------|---------------------------------|---------------|---------|---------|-------|
| 313.15 | 3.567                           | 4.219         | 2.880   | 5.032   | 3.640 |
| 318.15 | 3.513                           | 4.155         | 2.836   | 4.956   | 3.585 |
| 323.15 | 3.465                           | 4.098         | 2.797   | 4.888   | 3.536 |
| 328.15 | 3.363                           | 3.977         | 2.714   | 4.744   | 3.431 |
| 333.15 | 3.261                           | 3.856         | 2.632   | 4.600   | 3.327 |
| 338.15 | 3.237                           | 3.828         | 2.612   | 4.566   | 3.302 |
| 343.15 | 3.219                           | 3.806         | 2.598   | 4.540   | 3.284 |
| 348.15 | 3.447                           | 4.077         | 2.782   | 4.863   | 3.517 |
| 353.15 | 3.682                           | 4.354         | 2.972   | 5.194   | 3.757 |
| 358.15 | 3.904                           | 4.617         | 3.151   | 5.508   | 3.984 |

|        |       |       |       |       |       |
|--------|-------|-------|-------|-------|-------|
| 363.15 | 4.133 | 4.888 | 3.336 | 5.830 | 4.217 |
| 368.15 | 3.928 | 4.646 | 3.171 | 5.542 | 4.008 |
| 373.15 | 3.724 | 4.404 | 3.006 | 5.253 | 3.800 |

**Table S5.** Values of  $-\Delta G_a^0(T)$  (kJ/mol) of the various polar solvents adsorbed on PLA polymer as a function of the temperature.

| T(K)   | CH <sub>2</sub> Cl <sub>2</sub> | Ethyl Acetate | Acetone | Toluene | THF    |
|--------|---------------------------------|---------------|---------|---------|--------|
| 313.15 | 13.209                          | 7.574         | 7.976   | 14.753  | 12.424 |
| 318.15 | 12.493                          | 6.930         | 7.711   | 14.325  | 11.910 |
| 323.15 | 11.782                          | 6.312         | 7.431   | 13.905  | 11.403 |
| 328.15 | 10.999                          | 5.660         | 7.035   | 13.455  | 10.840 |
| 333.15 | 10.215                          | 5.077         | 6.862   | 13.005  | 10.277 |
| 338.15 | 11.223                          | 7.055         | 9.825   | 13.911  | 12.447 |
| 343.15 | 12.237                          | 8.850         | 13.578  | 14.825  | 14.640 |
| 348.15 | 11.196                          | 8.242         | 10.325  | 14.300  | 12.273 |
| 353.15 | 10.160                          | 7.021         | 6.647   | 13.784  | 9.499  |
| 358.15 | 10.268                          | 6.828         | 6.205   | 13.957  | 9.417  |
| 363.15 | 10.383                          | 6.713         | 5.990   | 14.138  | 9.341  |
| 368.15 | 10.032                          | 6.229         | 5.475   | 13.664  | 8.820  |
| 373.15 | 9.658                           | 5.669         | 5.011   | 13.240  | 8.235  |

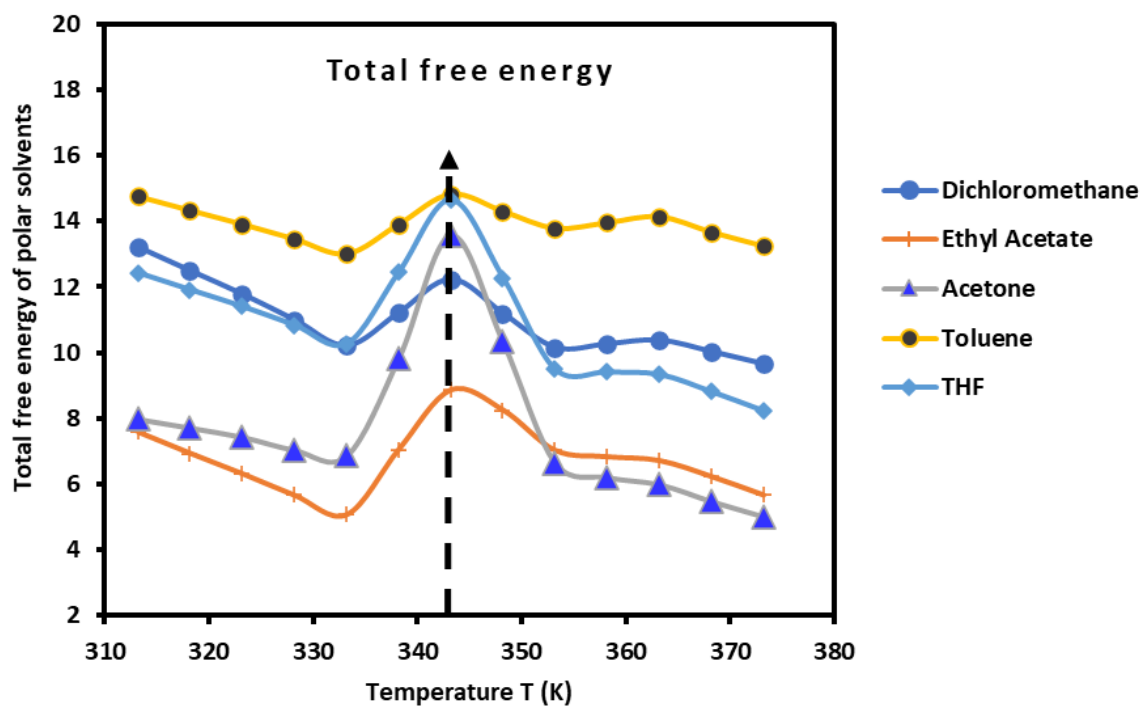

**Figure S1.** Variations the total free energy  $\Delta G_a^d(T)$  (kJ/mol) of polar molecules adsorbed on PLA polymer as a function of the temperature.

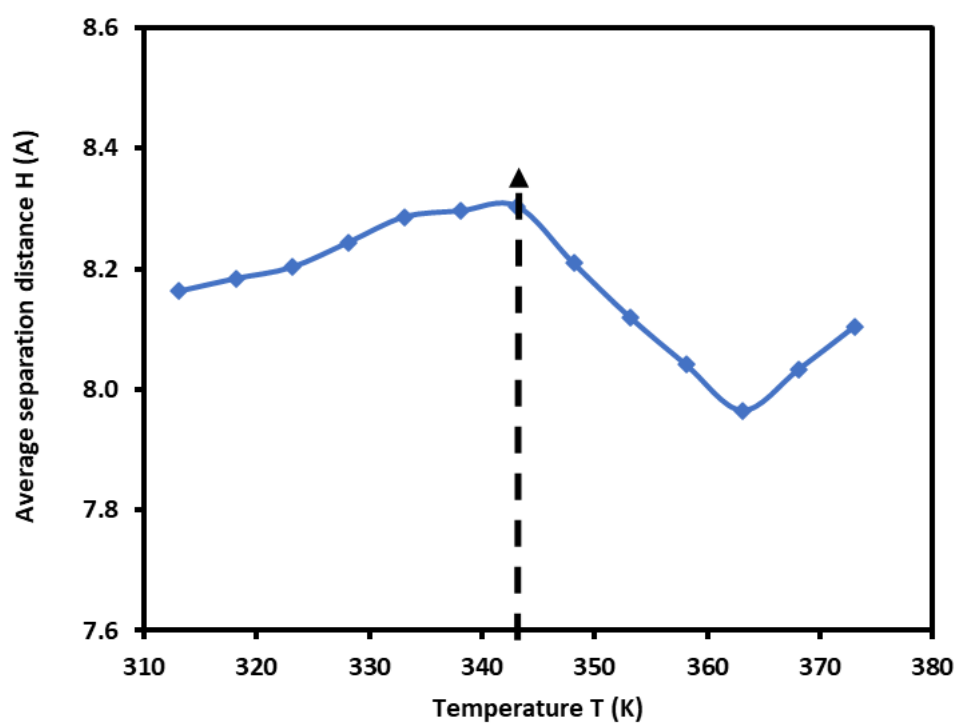

Figure S2. Variations of the average separation distance  $H$  (in Å) as a function of the temperature

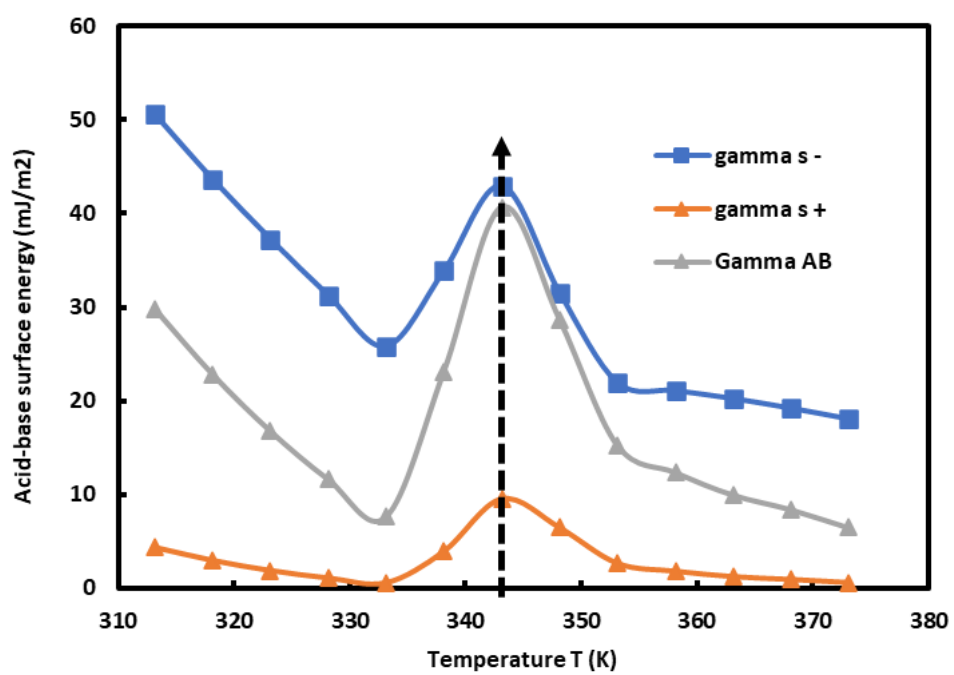

**Figure S3.** Variations of the polar acid and base surface energies  $\gamma_s^+$ ,  $\gamma_s^-$  and  $\gamma_s^{AB}$  (mJ/m<sup>2</sup>) of PLA as a function of the temperature.
